# Supplementary material for: Diagnosis and risk factor mining for valvular heart disease with atrial fibrillation via ensemble machine learning
Source: Research Square preprint supplement (doi:10.21203/rs.3.rs-4002924/v1), 2024-03-19
Supplement: Supplementary file 1 [file 469297c16e3f0e7f7778e8f0.docx]

**Abbreviations:**

LAD, left atrial diameter;

RAD, right atrial diameter;

LVD, left ventricle diameter;

RVD, right ventricle diameter;

Emv, peak mitral e-wave velocity;

SV, stroke volume;

IVS, interventricular septum;

LVPW, left ventricular posterior wall;

AAO, ascending aorta;

AV, aortic valve;

EDD, end-diastolic dimension;

ESD, end-systolic dimension;

EDV, end-diastolic volume;

ESV, end-systolic volume;

EF, ejection fraction;

FS, fractional shortening
