# Supplementary material for: Diagnosis and risk factor mining for valvular heart disease with atrial fibrillation via ensemble machine learning
Source: Research Square preprint supplement (doi:10.21203/rs.3.rs-4002924/v1), 2024-03-19
Supplement: Supplementary file 2 [file 5304e7fa6e81d28b9bda059f.docx]

**Hyperparameters of each model:**

Random Forest:

n_estimators=820, min_samples_leaf=3, max_features=3, min_samples_split=7, max_depth=21

XGBoost:

objective="binary:logistic", learning_rate=0.01, n_estimators=400, max_depth=5, min_child_weight=2

LightGBM:

learning_rate=0.05, n_estimators=240, num_leaves=5, max_depth=4, min_child_samples=20

Weighting Model:

Add hyperparameter in XGBoost : scale_pos_weight=1.5. The remaining hyperparameters remain consistent with the base models.

Stacking Model:

LogisticRegression()

Random Forest(n_estimators=250)

LightGBM(n_estimators=250)

XGBoost(n_estimators=200)

classifiers=[Random Forest, LightGBM, XGBoost, LogisticRegression], meta_classifier=lr, cv=5, use_probas=True

Blending Model:

LogisticRegression()

Random Forest(n_estimators=250)

LightGBM(n_estimators=250)

XGBoost(n_estimators=200)

classifiers=[Random Forest, LightGBM, XGBoost, LogisticRegression], meta_classifier=lr, test_size=0.7
